# Supplementary material
Source: PubMed Central journal article supplement (PMC8249357)

# Least Pain

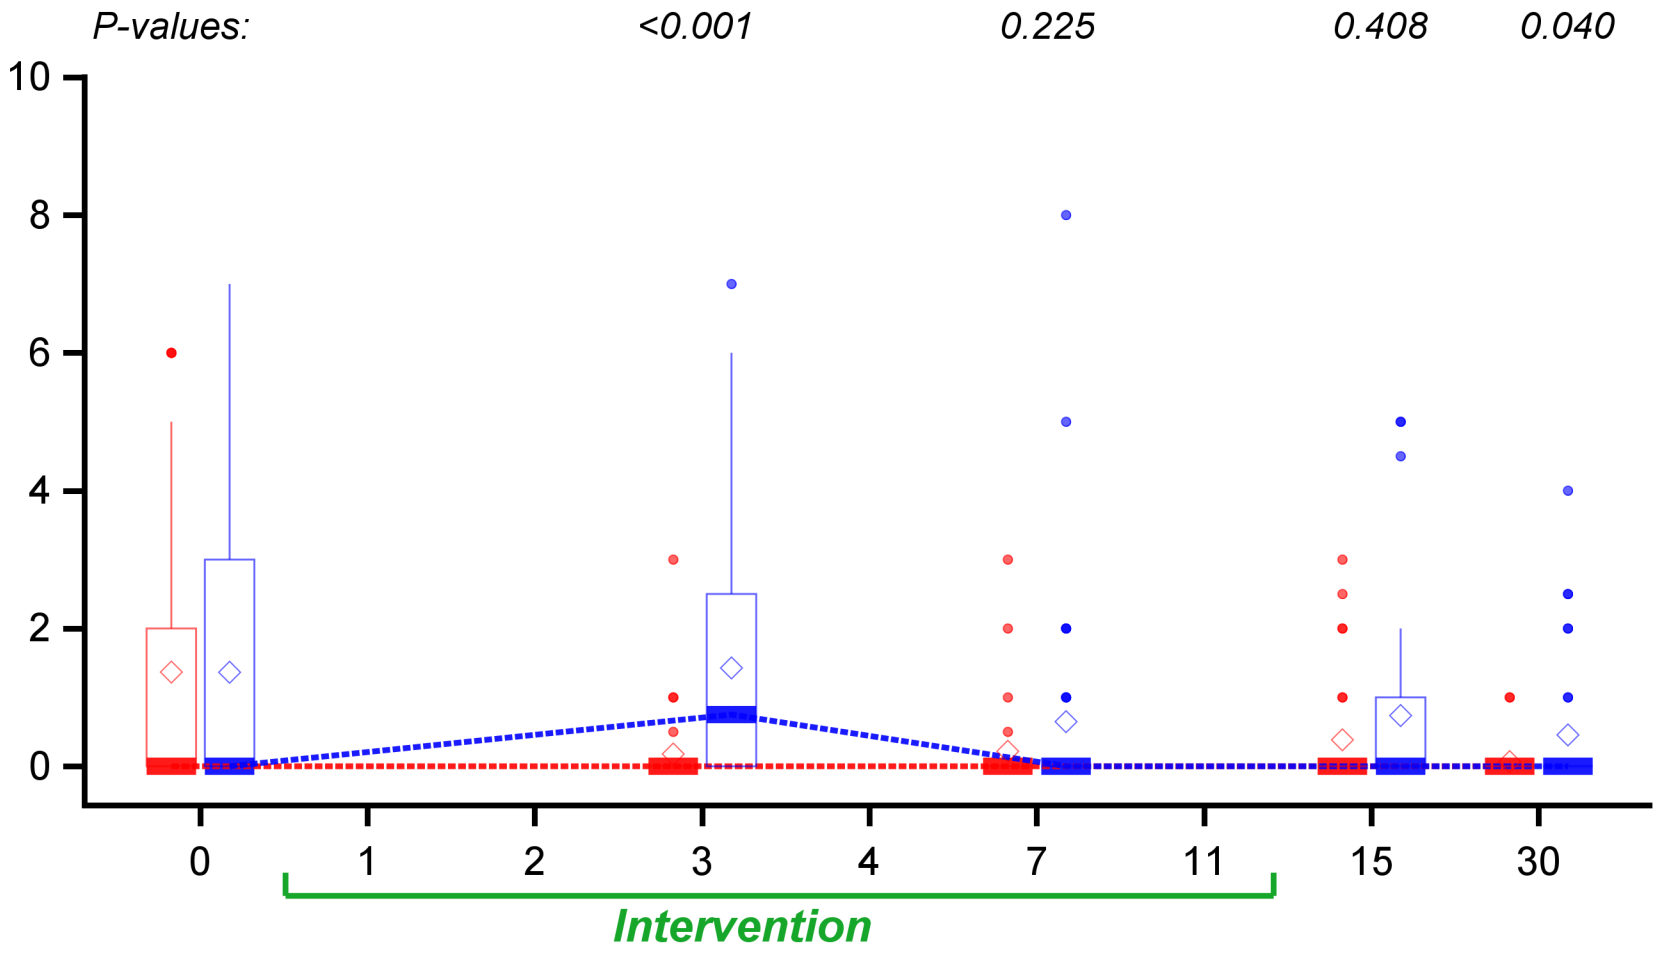

# Current Pain

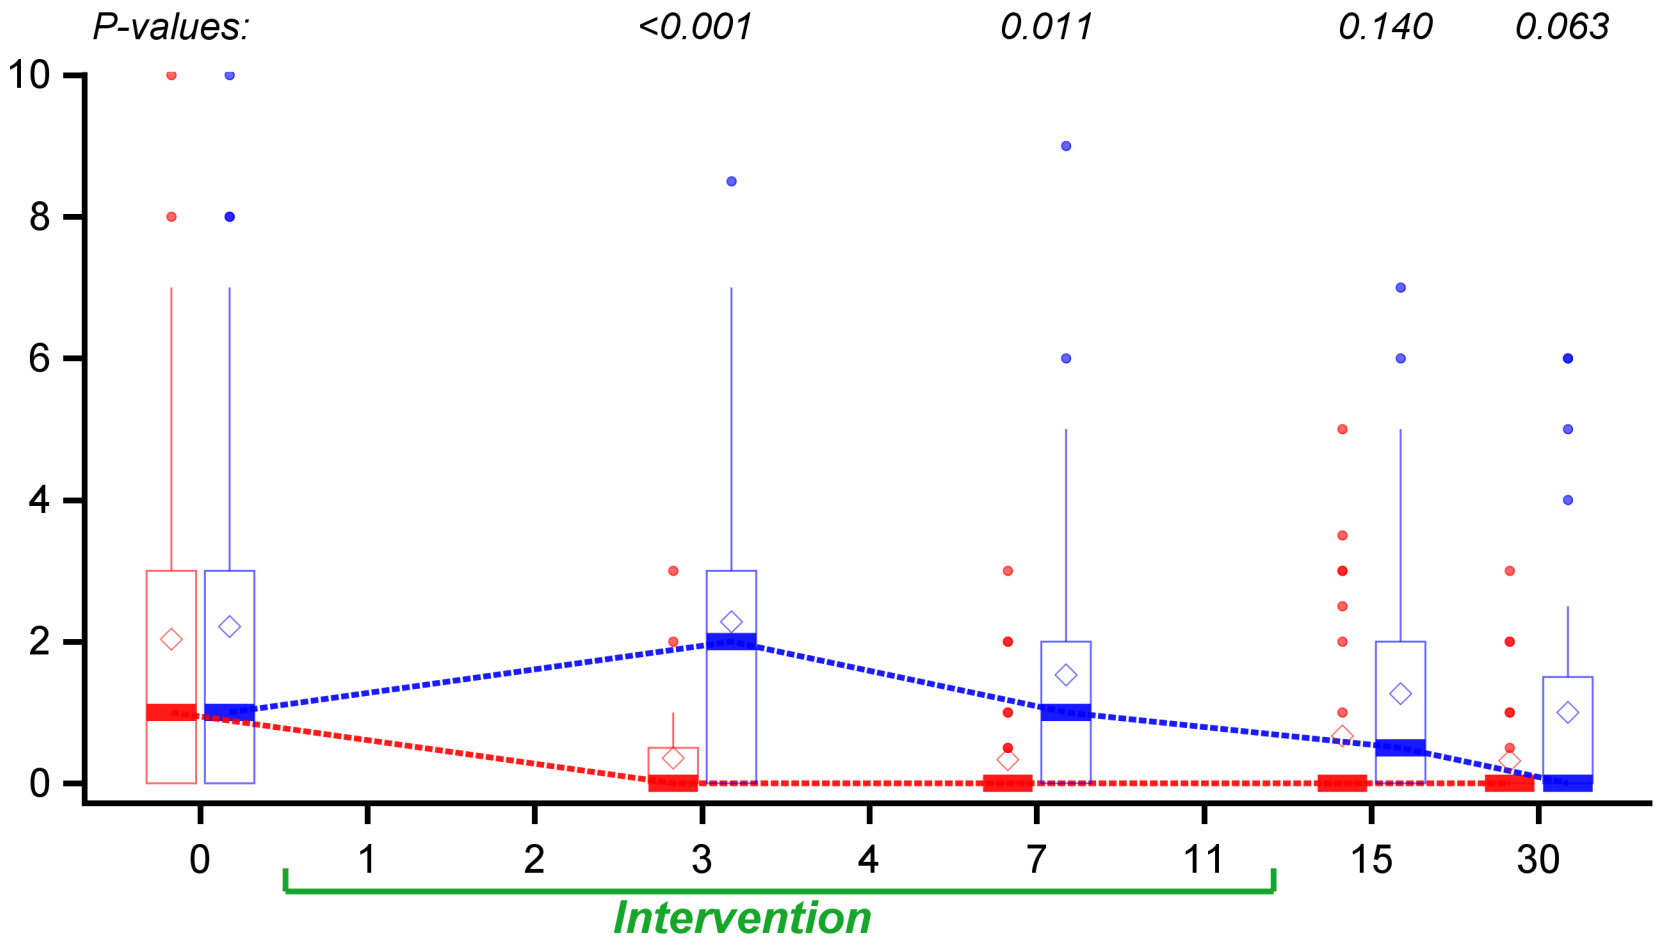

**Postoperative Day**

— Stimulation — Sham (Placebo)

Supplement: NIHMS1683649-supplement-Figure_6__supplemental.pdf [file NIHMS1683649-supplement-Figure_6__supplemental.pdf]
